# Supplementary material
Source: HighWire-hosted journal article supplement (http://www.ajnr.org/highwire/filestream/77077/field_highwire_adjunct_files/0/20-00100.pdf)
Supplement: 20-00100.pdf [file 20-00100.pdf]

**On-line Table 1: Conventional MR imaging results**

|                                                         | CHD ( <i>n</i> = 48) (No.) (%) | Control ( <i>n</i> = 48) (No.) (%) |
|---------------------------------------------------------|--------------------------------|------------------------------------|
| Normal brain MR imaging                                 | 37 (77.1%)                     | 43 (89.6%)                         |
| Brain abnormalities most likely developmental in origin | ( <i>n</i> = 7)                | ( <i>n</i> = 3)                    |
| Gray matter heterotopia                                 | 3.0%                           | 1.0%                               |
| Developmental venous anomaly                            | 3.0%                           | 2.0%                               |
| Chiari malformation I                                   | 1.0%                           | 0.0%                               |
| Brain abnormalities most likely acquired in origin      | ( <i>n</i> = 9)                | ( <i>n</i> = 3)                    |
| Space-occupying lesion                                  | 1.0%                           | 0.0%                               |
| Periventricular white matter injury                     | 2.0%                           | 0.0%                               |
| Asymmetric ventricles                                   | 2.0%                           | 1.0%                               |
| Enlarged perivascular spaces                            | 2.0%                           | 0.0%                               |
| Focal rounded susceptibility artifacts                  | 0.0%                           | 0.0%                               |
| Diffuse susceptibility artifacts                        | 2.0%                           | 2.0%                               |

**On-line Table 2: Total and regional brain volume comparisons between patients with CHD and controls<sup>a</sup>**

| Regional Volumes (mm <sup>3</sup> ) | CHD (Mean ± SD) ( <i>n</i> = 48) | Control (Mean ± SD) ( <i>n</i> = 48) | <i>q</i> Value |
|-------------------------------------|----------------------------------|--------------------------------------|----------------|
| TBV                                 | 12.1 × 10 <sup>5</sup> ± 1.4     | 13.3 × 10 <sup>5</sup> ± 1.2         | <0.001         |
| Right thalamus                      | 5591 ± 629.2                     | 6117.2 ± 476.5                       | 0.321          |
| Right striatum                      | 9451 ± 1084                      | 10,207.9 ± 810.2                     | 0.665          |
| Right globus pallidus               | 1384.8 ± 214.26                  | 1573.7 ± 122.4                       | 0.036          |
| Left thalamus                       | 5742 ± 659.3                     | 6276.1 ± 497.1                       | 0.321          |
| Left striatum                       | 9094 ± 1022.5                    | 9821.7 ± 803.0                       | 0.665          |
| Left globus pallidus                | 1446 ± 218.3                     | 1629.2 ± 122.4                       | 0.056          |

**Note:**—TBV indicates total brain volume.

<sup>a</sup> Controlled for TBV and socioeconomic status.
